# Supplementary material for: In Entamoeba histolytica, a BspA family protein is required for chemotaxis toward tumour necrosis factor
Source: PubMed Central journal article supplement (PMC5349171; doi:10.15698/mic2015.07.214), 2015-07-06

The following supplemental information is available for this article:

Table S1. RNA seq data of BspA like gene transcription from virulent strain of *E. histolytica*.

|            | Unicity | Number of reads | Number of reads gene size corrected (read per kb per million mapped reads) | Gene length (bp) |
|------------|---------|-----------------|----------------------------------------------------------------------------|------------------|
| EHI_000760 | 1       | 255             | 2,006                                                                      | 1202             |
| EHI_002120 | 1       | 101             | 1,49                                                                       | 641              |
| EHI_003380 | 1       | 25              | 0,278                                                                      | 851              |
| EHI_003790 | 1       | 3               | 0,059                                                                      | 482              |
| EHI_004360 | 1       | 605             | 3,233                                                                      | 1769             |
| EHI_008340 | 1       | 1               | 0,022                                                                      | 428              |
| EHI_010000 | 1       | 44              | 0,383                                                                      | 1085             |
| EHI_012090 | 1       | 264             | 3,787                                                                      | 659              |
| EHI_013750 | 1       | 2               | 0,023                                                                      | 812              |
| EHI_013940 | 1       | 125             | 0,66                                                                       | 1790             |
| EHI_015120 | 1       | 30084           | 281,587                                                                    | 1010             |
| EHI_016240 | 1       | 1               | 0,007                                                                      | 1342             |
| EHI_016490 | 1       | 561             | 1,446                                                                      | 3668             |
| EHI_017710 | 1       | 551             | 4,069                                                                      | 1280             |
| EHI_020090 | 1       | 133             | 0,557                                                                      | 2258             |

|            |   |      |        |      |
|------------|---|------|--------|------|
| EHI_024580 | 1 | 425  | 3,491  | 1151 |
| EHI_027680 | 1 | 407  | 2,978  | 1292 |
| EHI_028330 | 1 | 12   | 0,243  | 467  |
| EHI_034610 | 1 | 125  | 1,111  | 1064 |
| EHI_038810 | 1 | 1388 | 6,712  | 1955 |
| EHI_041470 | 1 | 2    | 0,014  | 1346 |
| EHI_042470 | 1 | 11   | 0,19   | 547  |
| EHI_046800 | 1 | 5    | 0,098  | 482  |
| EHI_047820 | 1 | 1    | 0,01   | 926  |
| EHI_048660 | 1 | 244  | 1,064  | 2168 |
| EHI_049160 | 1 | 8    | 0,062  | 1217 |
| EHI_051070 | 1 | 150  | 0,818  | 1733 |
| EHI_051080 | 1 | 328  | 1,037  | 2990 |
| EHI_054160 | 1 | 1405 | 15,128 | 878  |
| EHI_062750 | 1 | 116  | 0,924  | 1187 |
| EHI_063030 | 1 | 846  | 9,636  | 830  |
| EHI_064920 | 1 | 2    | 0,04   | 467  |
| EHI_069190 | 1 | 2079 | 15,391 | 1277 |
| EHI_070230 | 1 | 190  | 1,323  | 1358 |

|            |   |      |        |      |
|------------|---|------|--------|------|
| EHI_070330 | 1 | 10   | 0,065  | 1454 |
| EHI_072070 | 1 | 1995 | 14,7   | 1283 |
| EHI_075960 | 1 | 705  | 4,132  | 1613 |
| EHI_077280 | 1 | 2    | 0,011  | 1670 |
| EHI_078570 | 1 | 402  | 2,208  | 1721 |
| EHI_079970 | 1 | 8    | 0,072  | 1050 |
| EHI_082060 | 1 | 52   | 0,248  | 1985 |
| EHI_084160 | 1 | 5    | 0,079  | 596  |
| EHI_088100 | 1 | 1590 | 12,412 | 1211 |
| EHI_094080 | 1 | 207  | 0,772  | 2534 |
| EHI_095060 | 1 | 656  | 4,789  | 1295 |
| EHI_100700 | 1 | 18   | 0,115  | 1478 |
| EHI_102380 | 1 | 19   | 0,168  | 1067 |
| EHI_103140 | 1 | 16   | 0,194  | 778  |
| EHI_105370 | 1 | 1    | 0,012  | 769  |
| EHI_107220 | 1 | 237  | 1,907  | 1175 |
| EHI_110590 | 1 | 603  | 2,252  | 2531 |
| EHI_110760 | 1 | 73   | 0,508  | 1358 |
| EHI_111950 | 0 | 0    | 0      | 580  |

|            |   |      |        |      |
|------------|---|------|--------|------|
| EHI_111960 | 1 | 6    | 0,115  | 494  |
| EHI_112030 | 1 | 235  | 0,661  | 3359 |
| EHI_112290 | 1 | 2    | 0,03   | 640  |
| EHI_113310 | 1 | 9    | 0,161  | 527  |
| EHI_113990 | 1 | 2798 | 7,903  | 3347 |
| EHI_115500 | 1 | 48   | 0,389  | 1166 |
| EHI_119470 | 1 | 876  | 4,804  | 1724 |
| EHI_120570 | 1 | 8    | 0,071  | 1067 |
| EHI_122410 | 1 | 19   | 0,094  | 1907 |
| EHI_123820 | 1 | 8    | 0,05   | 1502 |
| EHI_127100 | 1 | 178  | 1,162  | 1448 |
| EHI_127710 | 1 | 18   | 0,115  | 1478 |
| EHI_128460 | 1 | 2    | 0,027  | 713  |
| EHI_129870 | 1 | 332  | 2,942  | 1067 |
| EHI_131490 | 1 | 3051 | 24,116 | 1196 |
| EHI_134140 | 1 | 4    | 0,029  | 1316 |
| EHI_137910 | 1 | 42   | 0,124  | 3197 |
| EHI_139390 | 1 | 223  | 1,519  | 1388 |
| EHI_139430 | 1 | 205  | 0,96   | 2018 |

|            |   |     |       |      |
|------------|---|-----|-------|------|
| EHI_147680 | 1 | 139 | 1,133 | 1160 |
| EHI_148460 | 1 | 604 | 5,475 | 1043 |
| EHI_148530 | 1 | 150 | 0,954 | 1487 |
| EHI_150150 | 1 | 30  | 0,731 | 388  |
| EHI_151330 | 1 | 628 | 1,79  | 3317 |
| EHI_152950 | 1 | 109 | 0,974 | 1058 |
| EHI_153950 | 1 | 25  | 0,533 | 443  |
| EHI_154170 | 1 | 12  | 0,149 | 759  |
| EHI_158740 | 1 | 2   | 0,027 | 698  |
| EHI_161300 | 1 | 13  | 0,233 | 527  |
| EHI_163960 | 1 | 7   | 0,163 | 406  |
| EHI_166160 | 1 | 1   | 0,02  | 467  |
| EHI_173850 | 1 | 4   | 0,124 | 305  |
| EHI_176480 | 1 | 43  | 0,561 | 725  |
| EHI_184260 | 1 | 17  | 0,161 | 998  |
| EHI_189090 | 1 | 1   | 0,009 | 1024 |
| EHI_191510 | 1 | 27  | 0,189 | 1349 |
| EHI_192250 | 1 | 364 | 3,427 | 1004 |
| EHI_192600 | 1 | 61  | 0,705 | 818  |

|            |   |      |        |      |
|------------|---|------|--------|------|
| EHI_194290 | 1 | 71   | 0,567  | 1184 |
| EHI_198630 | 1 | 291  | 2,55   | 1079 |
| EHI_199270 | 1 | 67   | 0,714  | 887  |
| EHI_202250 | 1 | 1537 | 24,339 | 597  |

---

Figure S1: Three-dimensional prediction structure of EHI\_016490 (CSP) from *Entamoeba histolytica* generated by I-TASSER.

Figure S2: Dendogram showing the relatedness between EHI\_016490 and the BspA like proteins from *Entamoeba histolytica*. All 95 BspA like proteins expressed in trophozoites in *in vitro* culture were included in the phylogenetic tree, created by using ClustalX.

Figure S3: Three-dimensional prediction structure of the two most closely related BspA like proteins EHI\_112030 (A) and EHI\_151330 (B) from EHI\_016490 (CSP) and the two most divergent BspA like proteins EHI\_072070 (C) and EHI\_152950 (D).

Figure S4: 10% polyacrylamide gel electrophoresis under reducing conditions, and a Western blot of *Entamoeba histolytica* crude lysates. Twenty  $\mu\text{g}$  of proteins were loaded. A polyclonal rabbit antiserum against two synthetic peptides from EHI\_016490 detected bands at 45, 68 and 140 kDa. Pre-immune serum merely gave a low background signal.

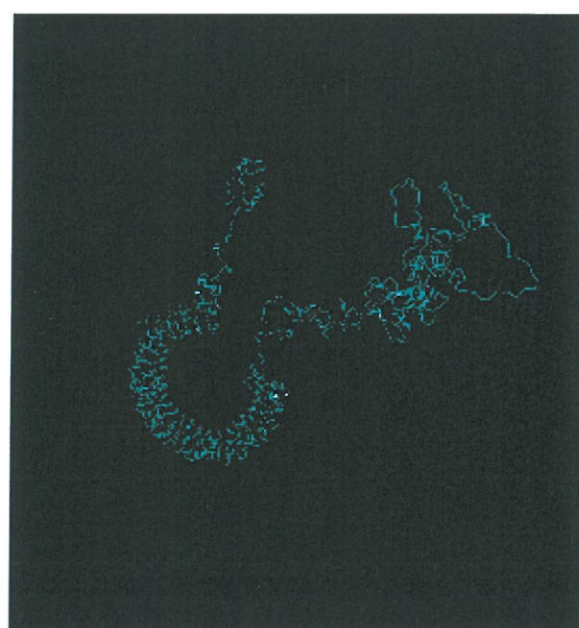

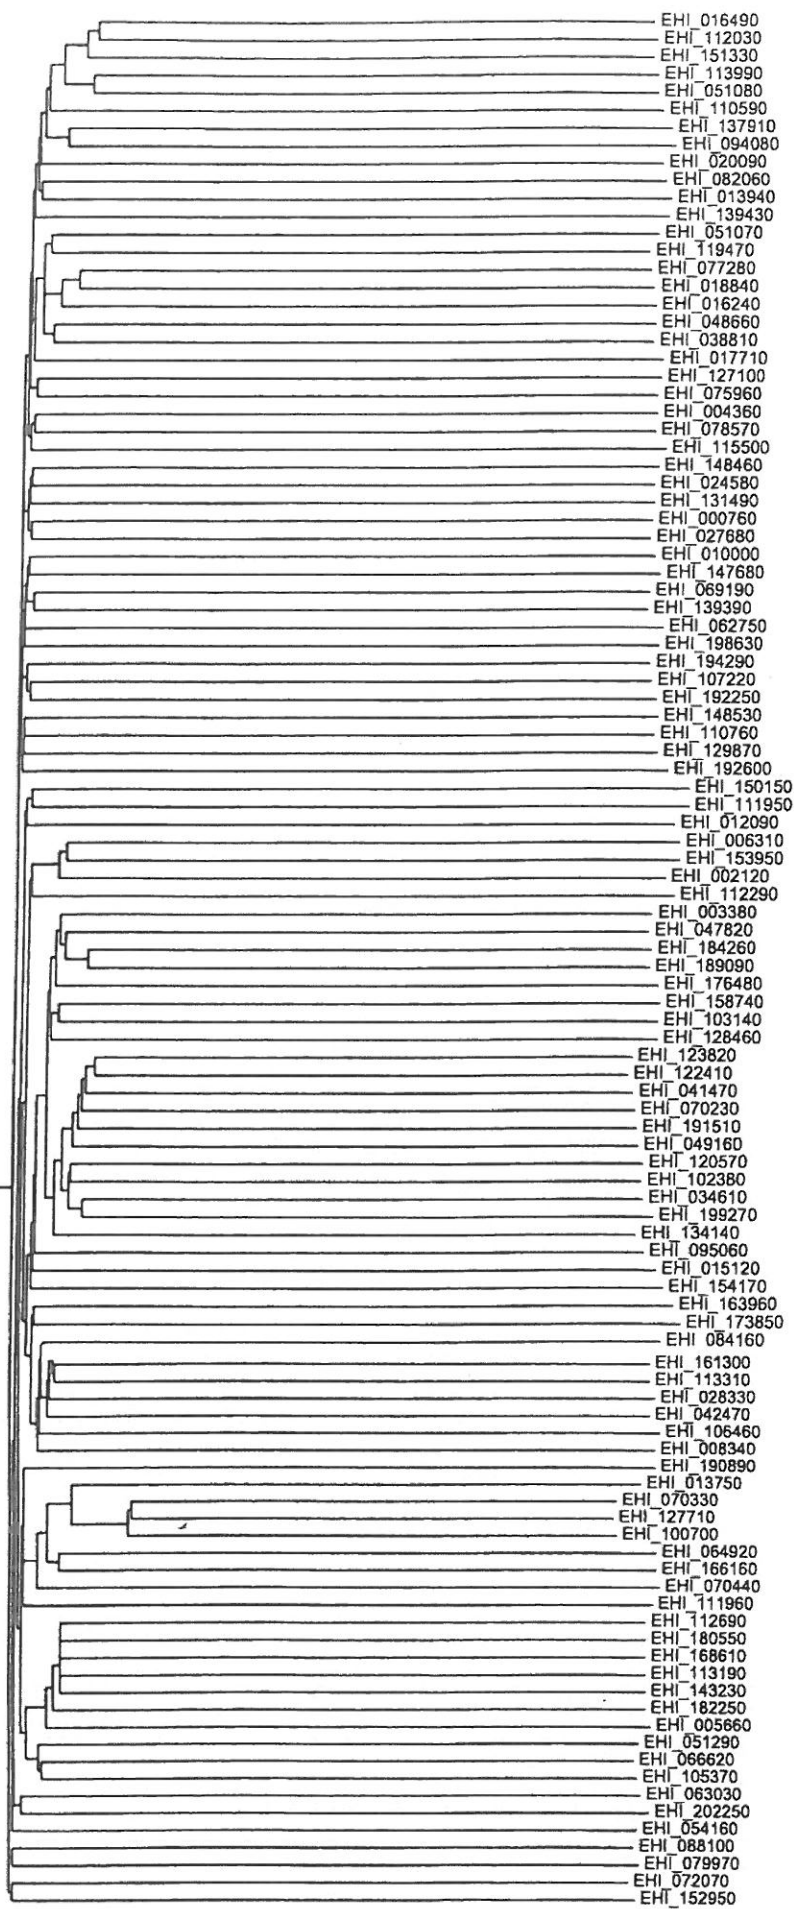

EHI\_016490  
EHI\_112030  
EHI\_151330  
EHI\_113990  
EHI\_051080  
EHI\_110590  
EHI\_137910  
EHI\_094080  
EHI\_020090  
EHI\_082060  
EHI\_013940  
EHI\_139430  
EHI\_051070  
EHI\_119470  
EHI\_077280  
EHI\_018840  
EHI\_016240  
EHI\_048660  
EHI\_038810  
EHI\_017710  
EHI\_127100  
EHI\_075960  
EHI\_004360  
EHI\_078570  
EHI\_115500  
EHI\_148460  
EHI\_024580  
EHI\_131490  
EHI\_000760  
EHI\_027680  
EHI\_010000  
EHI\_147680  
EHI\_069190  
EHI\_139390  
EHI\_062750  
EHI\_198630  
EHI\_194290  
EHI\_107220  
EHI\_192250  
EHI\_148530  
EHI\_110760  
EHI\_129870  
EHI\_192600  
EHI\_150150  
EHI\_111950  
EHI\_012090  
EHI\_006310  
EHI\_153950  
EHI\_002120  
EHI\_112290  
EHI\_003380  
EHI\_047820  
EHI\_184260  
EHI\_189090  
EHI\_176480  
EHI\_158740  
EHI\_103140  
EHI\_128460  
EHI\_123820  
EHI\_122410  
EHI\_041470  
EHI\_070230  
EHI\_191510  
EHI\_049160  
EHI\_120570  
EHI\_102380  
EHI\_034610  
EHI\_199270  
EHI\_134140  
EHI\_095060  
EHI\_015120  
EHI\_154170  
EHI\_163960  
EHI\_173850  
EHI\_084160  
EHI\_161300  
EHI\_113310  
EHI\_028330  
EHI\_042470  
EHI\_106460  
EHI\_008340  
EHI\_190890  
EHI\_013750  
EHI\_070330  
EHI\_127710  
EHI\_100700  
EHI\_064920  
EHI\_166160  
EHI\_070440  
EHI\_111960  
EHI\_112690  
EHI\_180550  
EHI\_168610  
EHI\_113190  
EHI\_143230  
EHI\_182250  
EHI\_005660  
EHI\_051290  
EHI\_066620  
EHI\_105370  
EHI\_063030  
EHI\_202250  
EHI\_054160  
EHI\_088100  
EHI\_079970  
EHI\_072070  
EHI\_152950



A

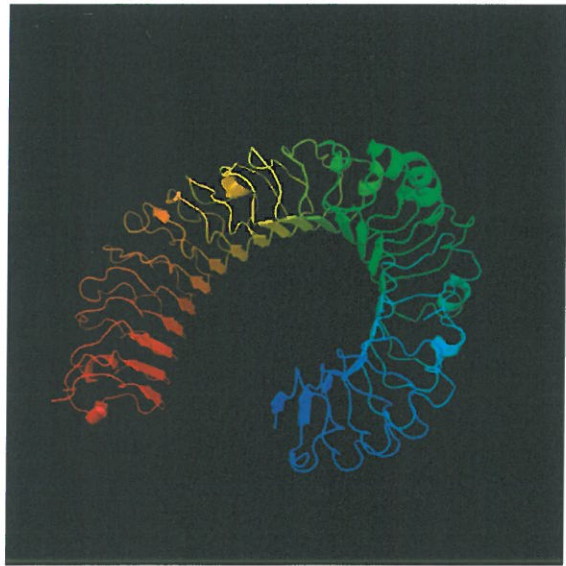

B

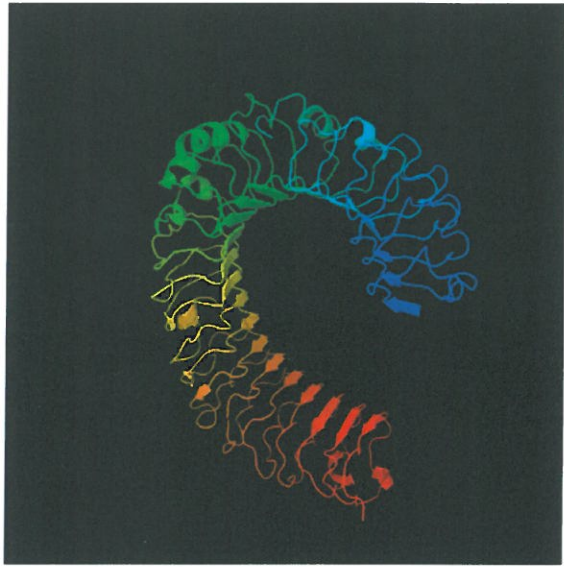

C

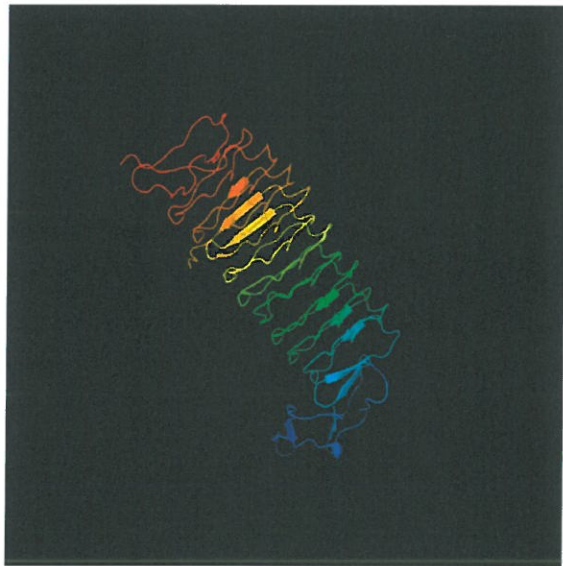

D

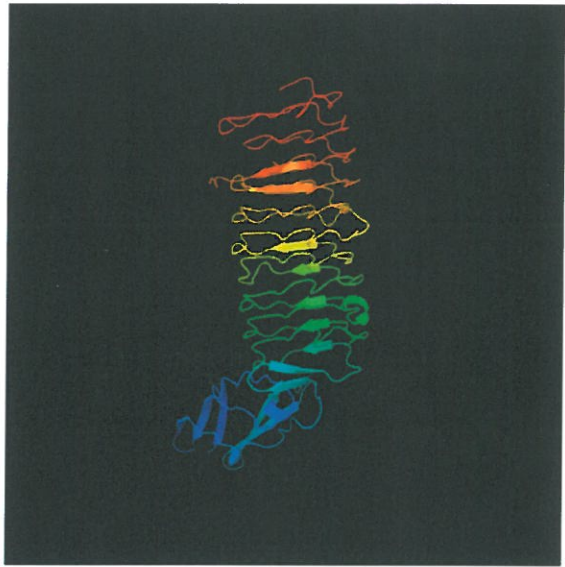

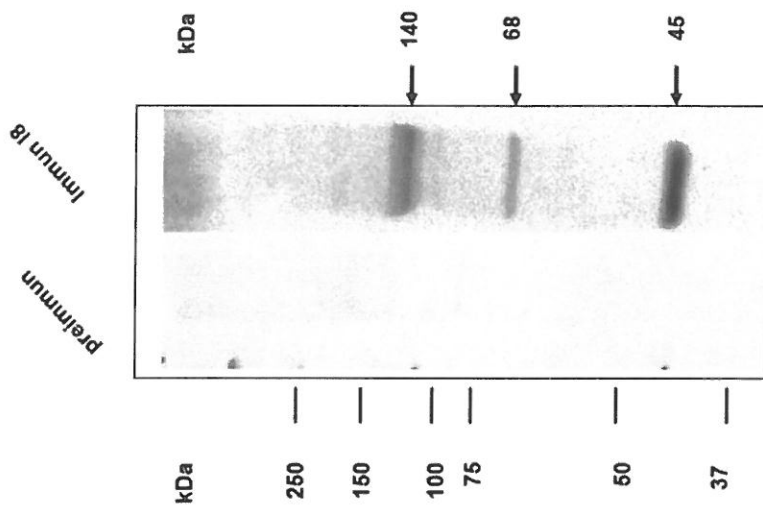

Supplement: mic-02-235-s01.pdf [file mic-02-235-s01.pdf]
